# Supplementary material for: Missed Opportunities in Earlier Identification of Individuals With First-Episode Psychosis
Source: Atypon-hosted journal article supplement (doi:10.1176/appi.ps.201800170), 2019-03-01
Supplement: appi.ps.201800170.ds001.pdf [file appi.ps.201800170.ds001.pdf]

**Table 1. Characteristics of those with noticed behavior change  $\leq 90$  days before hospitalization and  $>90$  days before hospitalization among 107 NYC START clients**

| Variable                                                        | Time from behavior change to hospitalization (TBCH) <sup>a</sup> |    |                   |    | p <sup>b</sup> |
|-----------------------------------------------------------------|------------------------------------------------------------------|----|-------------------|----|----------------|
|                                                                 | $\leq 90$ days (N=55)                                            |    | $>90$ days (N=52) |    |                |
|                                                                 | N                                                                | %  | N                 | %  |                |
| Gender                                                          |                                                                  |    |                   |    | 0.553          |
| Male                                                            | 34                                                               | 62 | 35                | 67 |                |
| Female                                                          | 21                                                               | 38 | 17                | 33 |                |
| Age category                                                    |                                                                  |    |                   |    | 0.758          |
| 18-21                                                           | 23                                                               | 42 | 24                | 46 |                |
| 22-25                                                           | 17                                                               | 31 | 17                | 33 |                |
| 26-30                                                           | 15                                                               | 27 | 11                | 21 |                |
| Race/Ethnicity                                                  |                                                                  |    |                   |    | 0.562          |
| Non-Hispanic Black                                              | 32                                                               | 58 | 25                | 48 |                |
| Non-Hispanic White                                              | 3                                                                | 5  | 6                 | 12 |                |
| Asian                                                           | 6                                                                | 11 | 6                 | 12 |                |
| Hispanic                                                        | 11                                                               | 20 | 14                | 27 |                |
| Other/Unknown                                                   | 3                                                                | 5  | 1                 | 2  |                |
| Insurance                                                       |                                                                  |    |                   |    | 0.932          |
| Medicaid                                                        | 33                                                               | 60 | 30                | 58 |                |
| Private                                                         | 13                                                               | 24 | 11                | 21 |                |
| Other                                                           | 4                                                                | 7  | 4                 | 8  |                |
| Uninsured                                                       | 5                                                                | 9  | 7                 | 13 |                |
| Educational status <sup>c</sup>                                 |                                                                  |    |                   |    | <b>0.002</b>   |
| School performance declined or left school before graduation    | 20                                                               | 43 | 35                | 74 |                |
| Still in school or completed degree                             | 26                                                               | 57 | 12                | 26 |                |
| Family noticing symptoms                                        |                                                                  |    |                   |    | <b>0.008</b>   |
| Family reported noticing symptoms prior to hospitalization      | 35                                                               | 64 | 45                | 87 |                |
| No mention of family noticing symptoms prior to hospitalization | 20                                                               | 36 | 7                 | 13 |                |
| Employment                                                      |                                                                  |    |                   |    | 0.650          |
| Lost employment                                                 | 5                                                                | 9  | 7                 | 13 |                |
| Employed (regularly or temporarily) or in school                | 13                                                               | 24 | 14                | 27 |                |
| Unemployed (looking and not looking for employment)             | 37                                                               | 67 | 31                | 60 |                |
| Legal status                                                    |                                                                  |    |                   |    | 0.766          |
| History of legal involvement prior to hospitalization           | 5                                                                | 9  | 4                 | 8  |                |
| No history of legal involvement prior to hospitalization        | 28                                                               | 51 | 30                | 58 |                |
| Unknown legal involvement prior to hospitalization              | 22                                                               | 40 | 18                | 35 |                |

<sup>a</sup>Mean TBCH 364±752 days, median 82 days, and range 0-4,087 days.

<sup>b</sup>P-values calculated with chi-square tests if all cells have N > 10; otherwise calculated with Fisher's exact test

<sup>c</sup>Information about educational status was missing for 9 in the ≤90 days group and 5 in the >90 days group
